# Supplementary material
Source: Royal Society of Chemistry journal article supplement (doi:10.1039/d6nj01258b)
Supplement: d6nj01258b1.pdf [file d6nj01258b1.pdf]

## Synthesis and DFT studies of a new paddle-wheel hetero-ligand system Zn(II) coordination polymer as catalyst for degradation of microplastics

Vincent O. Adimula<sup>a,b\*</sup>, Halimat O. Adekeye<sup>a</sup>, Funsho A. Oniye<sup>a</sup>, Emmanuel O. Adeniyi<sup>a</sup>, Samson O. Owalude<sup>c</sup>, Eric Hosten<sup>d</sup>, Adeniyi S. Ogunlaja<sup>d</sup>, Oluwatobi S. Oluwafemi<sup>b,e</sup>, Adedibu C. Tella<sup>c,f</sup>

<sup>a</sup>Department of Industrial Chemistry, University of Ilorin, P.M.B.1515, Ilorin 240003, Nigeria

<sup>b</sup>Department of Chemical Sciences, University of Johannesburg, Doornfontein, 2028, Johannesburg, South Africa.

<sup>c</sup>Department of Chemistry, University of Ilorin, P.M.B.1515, Ilorin 240003, Nigeria

<sup>d</sup>Department of Chemistry, Nelson Mandela University, PO Box 77000, Port Elizabeth, 6031, South Africa

<sup>e</sup>Centre for Nanomaterials Science Research, Department of Chemical Sciences, University of Johannesburg, Johannesburg, South Africa.

<sup>f</sup>Department of Chemistry, University of South Africa, Pretoria, South Africa.

\*Corresponding Author: vincentadimula@gmail.com

### Supplementary Data

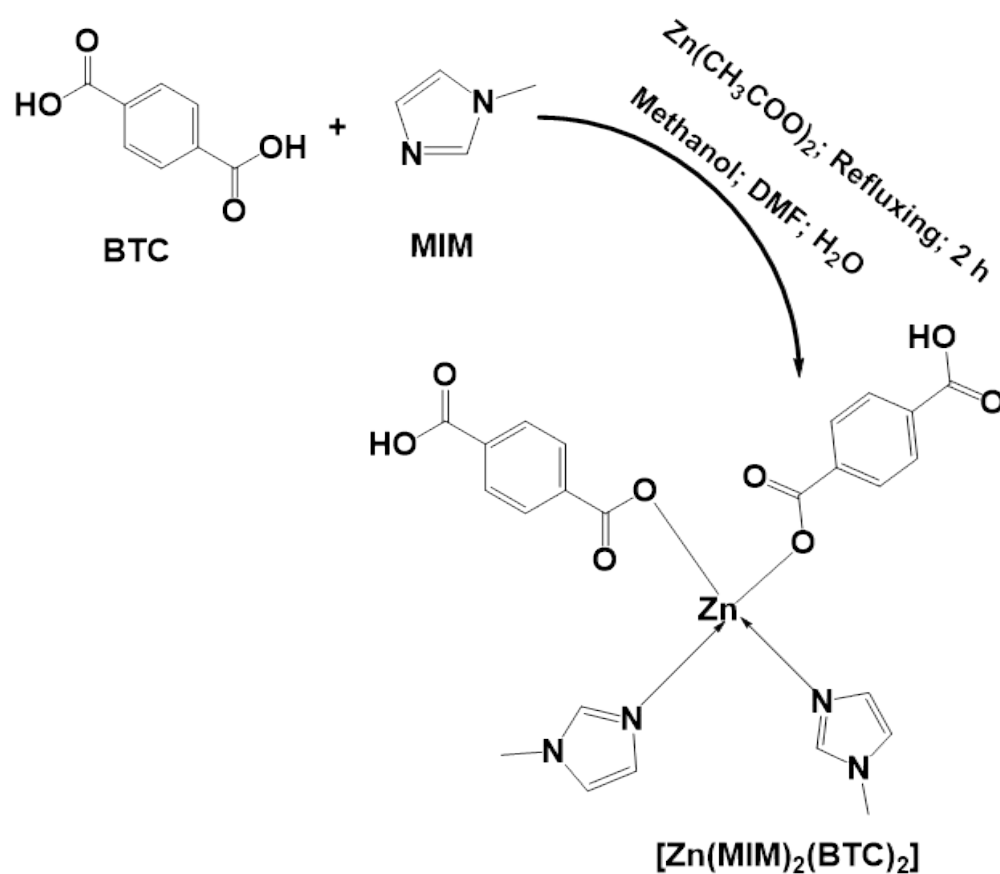

**Scheme S1** Reaction scheme for the design of [Zn(MIM)<sub>2</sub>(TPA)<sub>2</sub>]

Yield: 80%, melting pt.: >400 °C, elemental analysis (%): calc. (found) C, 51.27 (51.36); H, 3.72

(3.84); N, 10.32 (10.58); Co, 11.52 (11.65); Formula  $C_{16}H_{16}N_4O_4Zn$ ; IR (KBr pellets ( $cm^{-1}$ )): 420, 567, 1280, 1543.

### 1.0 Density Functional Theory (DFT) Studies

Density Functional Theory (DFT) cluster calculations were carried out to investigate the local electronic structure of the Zn-centered active-site model and its interaction with  $H_2O_2$ . These calculations do not attempt to model the full degradation mechanism of microplastics, which is a complex, multistep process involving radical chemistry, solvent effects, and polymer fragmentation. Instead, the DFT calculations provide a molecular-level insight about the catalyst-oxidant interaction. The following softwares, Avogadro (version 1.102.1), and ORCA 6.0 software were used to carry out the calculations with Perdew-Burke-Ernzerhof (PBE) exchange correlation functional,<sup>26</sup> a generalized gradient approximation known for its balance of accuracy and computational efficiency in describing transition metal complexes. The def2-SVP basis set was used, along with D3BJ dispersion correction to accurately account for non-covalent or dispersion (vanderWaals) interactions crucial for catalyst-substrate binding and TightSCF convergence setting was selected as a computationally efficient criterion to reduce numerical noise and enhance geometry optimization. The MESP (Molecular Electrostatic Potential) was generated from ORCA cube files (density + potential) and visualized in Avogadro. Single-point energies were computed in the gas phase and in implicit solvation model specifically Conductor-like Polarizable Continuum Model (CPCM) with the solvent parameters for water (CPCM (Water)) using the same geometry to estimate the bulk-solvent stabilization, while the implicit solvation energy was calculated using the formula:  $\Delta E_{solv} = E(\text{water}) - E(\text{gas})$ ; where  $\Delta E_{solv}$  is the solvation energy of the system,  $E(\text{water})$  is the absolute energy of the system in implicit water solvent, and  $E(\text{gas})$  is the absolute energy of the system in gas-phase.

The quantum chemical descriptors (molecular electrostatic potential (MESP), lowest unoccupied molecular orbital (LUMO) and highest occupied molecular orbital (HOMO) using the same functional and basis set to see the distribution of the electron densities in addition to the solvation energies were computed to provide a comprehensive knowledge of the behaviour of  $[Zn(MIM)_2(TPA)_2]$  as a catalyst.<sup>26</sup> However, it is important to note that this DFT results are primarily qualitative in nature, and higher-level methods may be required for quantitative thermodynamics and kinetics calculations.

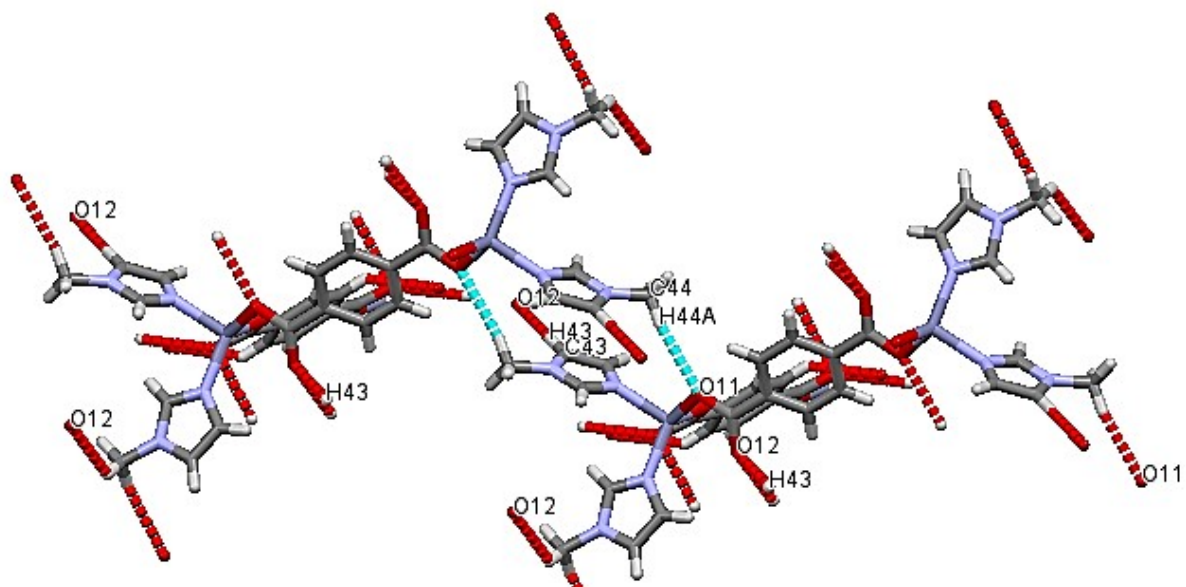

**Fig. S1** Intermolecular hydrogen bonding interaction in the [Zn(MIM)<sub>2</sub>(TPA)<sub>2</sub>].

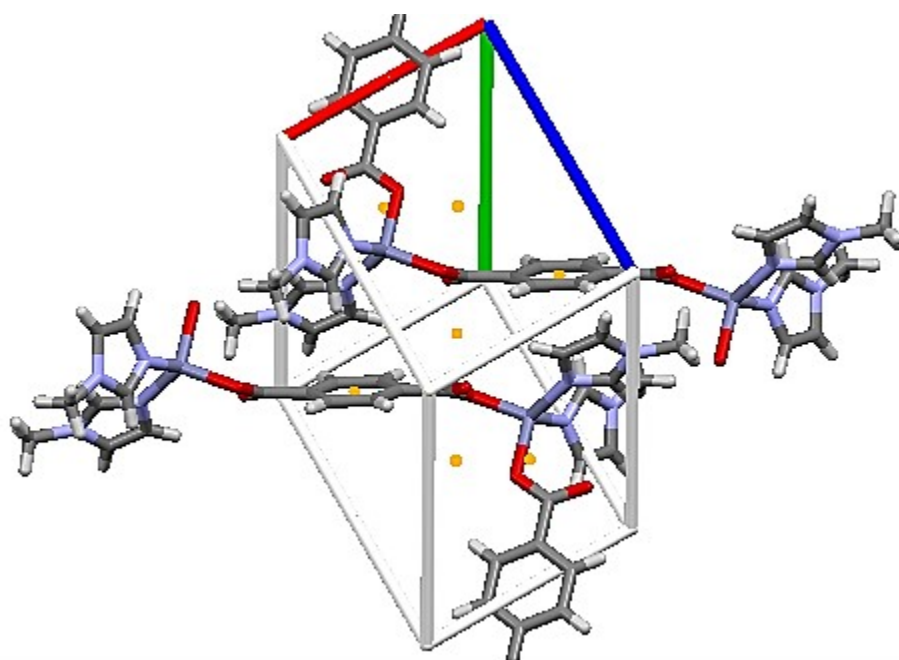

**Fig. S2**  $\pi \cdots \pi$  stacking view of [Zn(MIM)<sub>2</sub>(TPA)<sub>2</sub>].

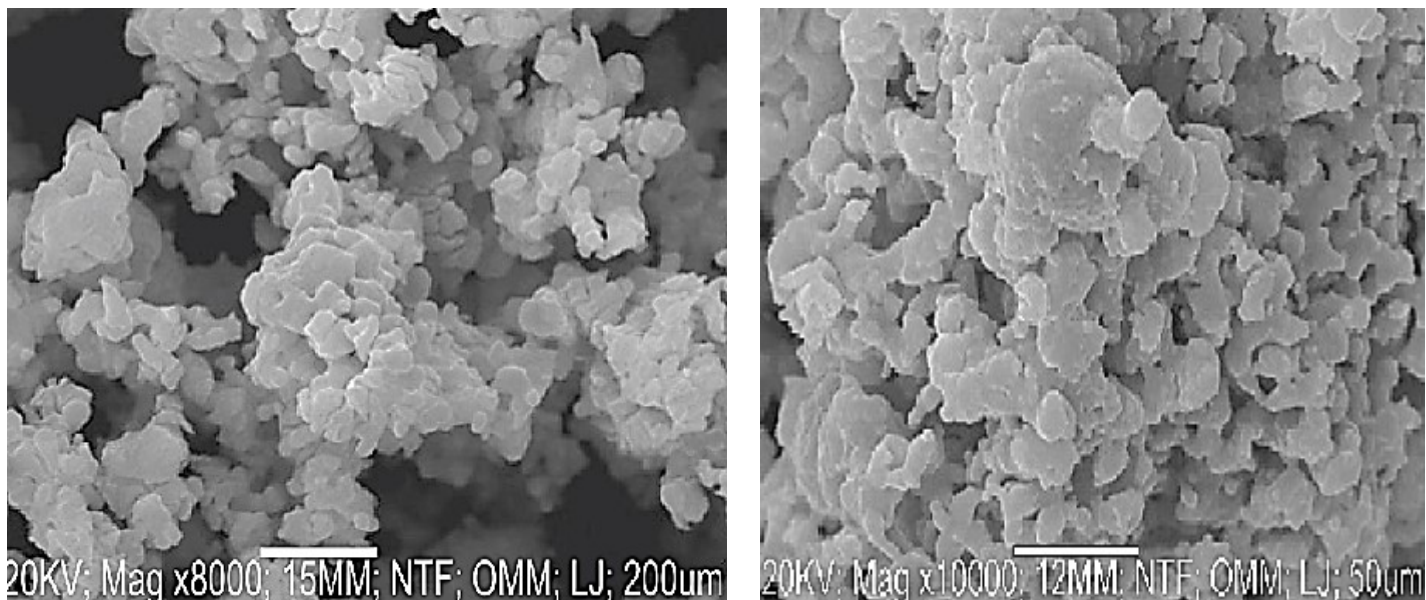

Fig. S3 SEM images of the [Zn(MIM)<sub>2</sub>(TPA)<sub>2</sub>] at different magnifications

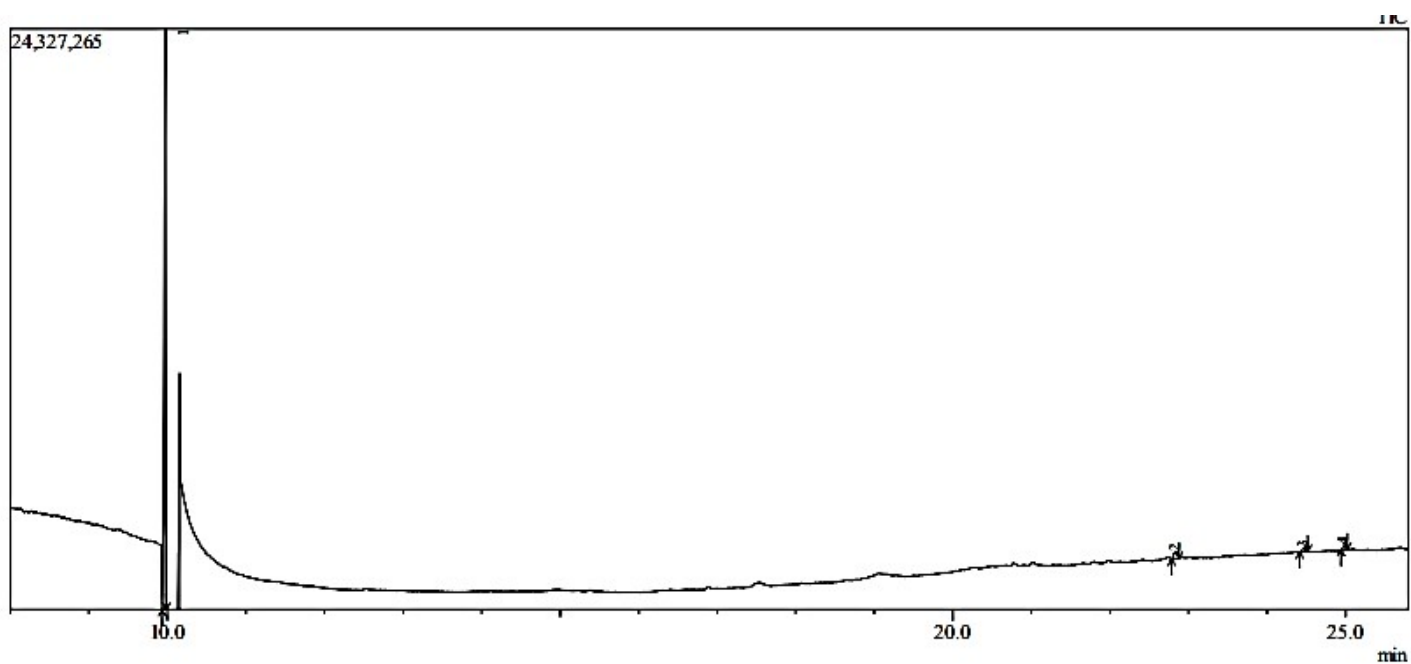

Fig. S4 GCMS chromatogram of degradation products of micronized HDPE in the presence of the synthesized Zn-CP as catalyst.

<< Target >>

Line#2 R.Time:22.835(Scan#2968) MassPeaks:139

RawMode:Averaged 22.830-22.840(2967-2969) BasePeak:55.10(18238)

BG Mode:Calc. from Peak Group 1 - Event 1

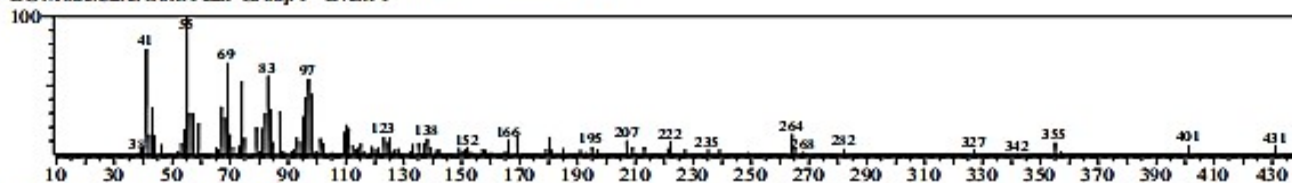

Hit#1 Entry:25930 Library:NIST11s.lib

SI:89 Formula:C19H36O2 CAS:1937-62-8 MolWeight:296 RefIndex:2085

CompName:9-Octadecenoic acid, methyl ester, (E)-\$\$ Elaidic acid, methyl ester\$\$ Methyl elaidate\$\$ Methyl trans-9-octadecenoate\$\$ (E)-9-Octadecenoic

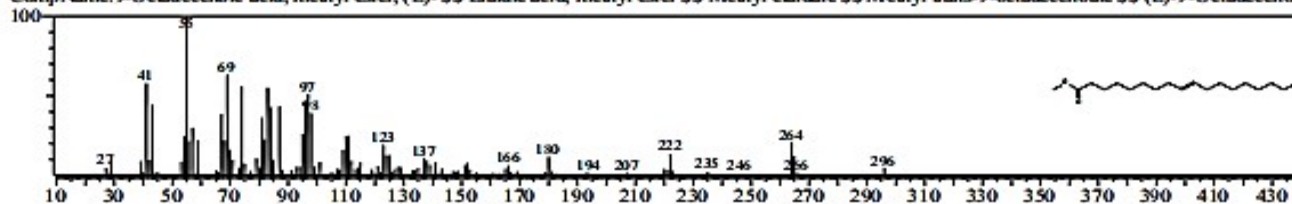

Hit#2 Entry:25931 Library:NIST11s.lib

SI:88 Formula:C19H36O2 CAS:52380-33-3 MolWeight:296 RefIndex:2085

CompName:11-Octadecenoic acid, methyl ester\$\$ Methyl 11-octadecenoate\$\$ Octadec-11-enoic acid, methyl ester\$\$ Methyl (11E)-11-octadecenoate # 8

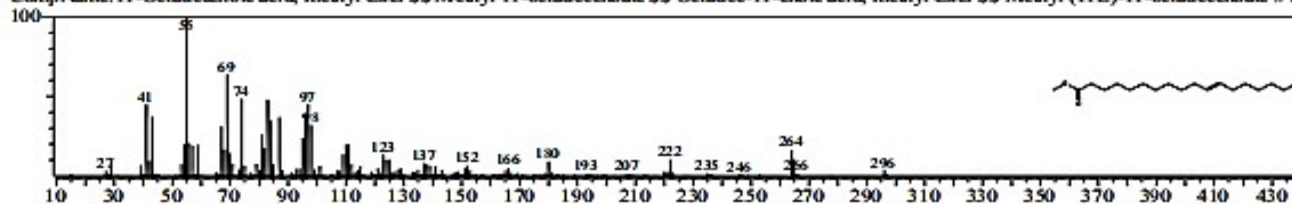

Hit#3 Entry:25927 Library:NIST11s.lib

SI:88 Formula:C19H36O2 CAS:112-62-9 MolWeight:296 RefIndex:2085

CompName:9-Octadecenoic acid (Z)-, methyl ester\$\$ Oleic acid, methyl ester\$\$ Emery oleic acid ester 2301\$\$ Methyl cis-9-octadecenoate\$\$ Methyl oleic

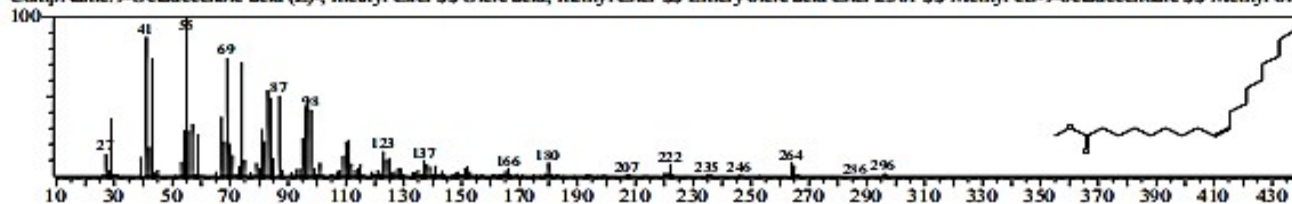

Hit#4 Entry:115408 Library:NIST11.lib

SI:88 Formula:C19H36O2 CAS:13481-95-3 MolWeight:296 RefIndex:2085

CompName:10-Octadecenoic acid, methyl ester\$\$ Methyl 10-octadecenoate\$\$

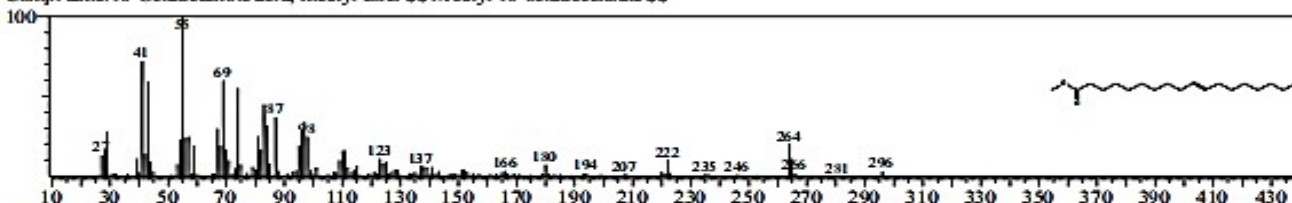

Hit#5 Entry:115413 Library:NIST11.lib

SI:88 Formula:C19H36O2 CAS:2777-58-4 MolWeight:296 RefIndex:2085

CompName:6-Octadecenoic acid, methyl ester, (Z)-\$\$ Methyl cis-6-octadecenoate\$\$ Methyl petroselinic acid\$\$ Methyl (6Z)-6-octadecenoate # 55 cis-6-Octa

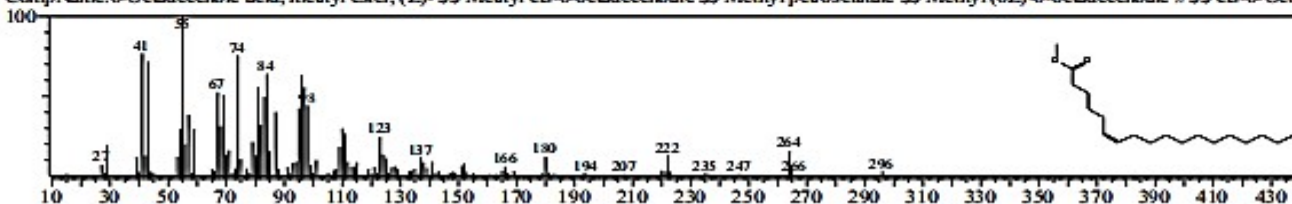

<< Target >>

Line#3 R.Time:24.470(Scan#:3295) MassPeak:124  
RawMode:Averaged 24.465-24.475(3294-3296) BasePeak:43.05(13161)  
BG Mode:Calc. from Peak Group 1 - Event 1

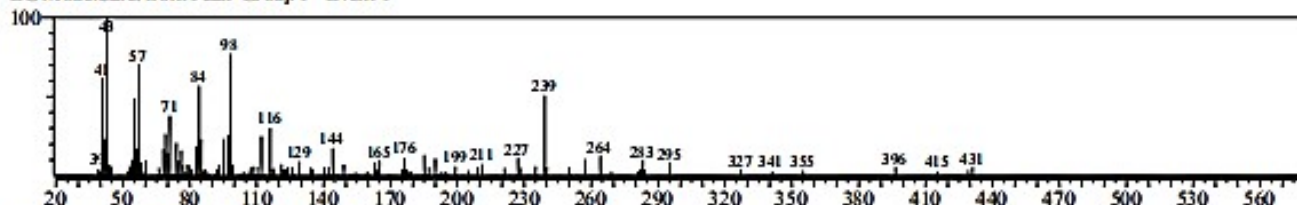

Hit#1 Entry:141605 Library:NIST11.lib  
SL:76 Formula:C19H38O4 CAS:23470-00-0 MolWeight:330 RetIndex:2498  
CompName:Hexadecanoic acid, 2-hydroxy-1-(hydroxymethyl)ethyl ester \$ Hexadecanoic acid, 2-hydroxy-1-(hydroxymethyl)ethyl ester \$ Palmitin, 2-mono- \$ Palmitic acid, beta-monoglyceride \$ 2-Hexadecanoyl g

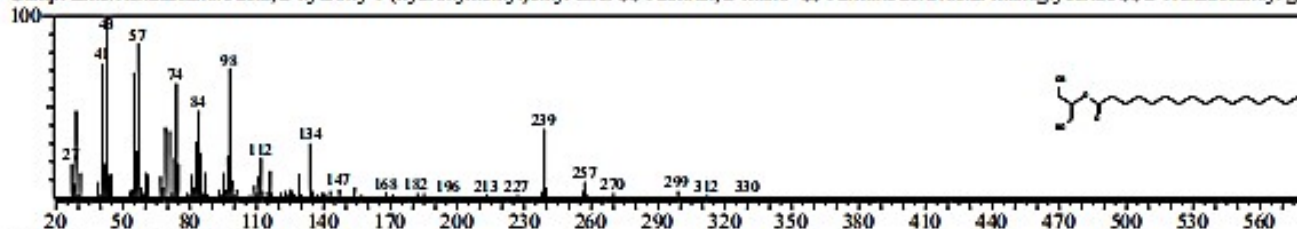

Hit#2 Entry:211894 Library:NIST11.lib  
SL:74 Formula:C37H74NO8P CAS:3026-45-7 MolWeight:691 RetIndex:0  
CompName:Hexadecanoic acid, 1-[[[(2-aminoethoxy)hydroxyphosphinyl]oxy]methyl]-1,2-ethanediyl ester \$ Palmitin, 1,2-di-, 2-aminoethyl hydrogen phos

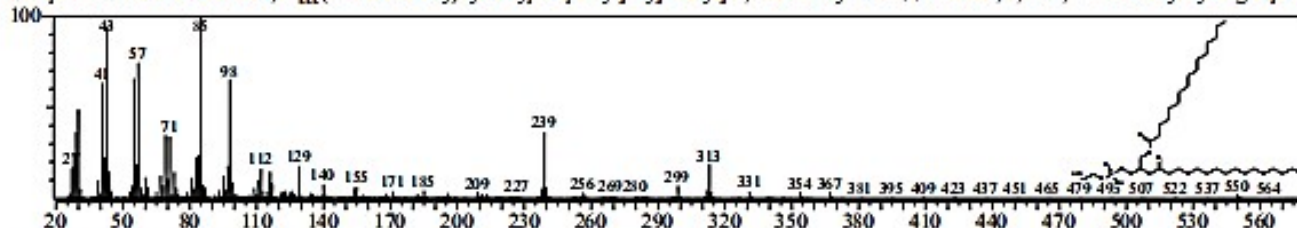

Hit#3 Entry:141606 Library:NIST11.lib  
SL:74 Formula:C19H38O4 CAS:542-44-9 MolWeight:330 RetIndex:2482  
CompName:Glycerol 1-palmitate \$ Hexadecanoic acid, 2,3-dihydroxypropyl ester \$ Palmitin, 1-mono- \$ alpha-Monopalmitin \$ Glycerol 1-monopalmit

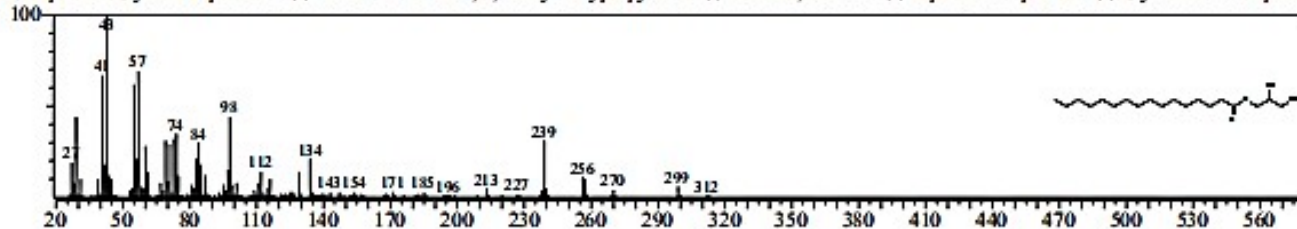

Hit#4 Entry:209268 Library:NIST11.lib  
SL:73 Formula:C35H68O5 CAS:761-35-3 MolWeight:568 RetIndex:4013  
CompName:Hexadecanoic acid, 1-(hydroxymethyl)-1,2-ethanediyl ester \$ Palmitin, 1,2-di- \$ Dipalmitin \$ Glycerol 1,2-dipalmitate \$ 1,2-Dipalmitin \$

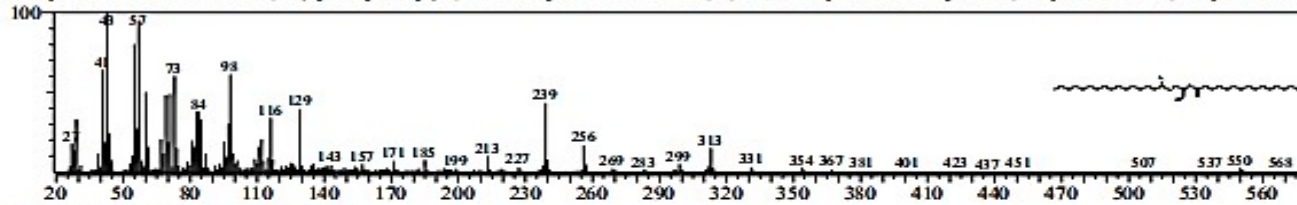

Hit#5 Entry:131087 Library:NIST11.lib  
SL:72 Formula:C18H36O4 CAS:98863-01-5 MolWeight:316 RetIndex:2399  
CompName:Hexadecanoic acid, 2-hydroxy-1-(hydroxymethyl)ethyl ester \$ 2-Hydroxy-1-(hydroxymethyl)ethyl pentadecanoate \$

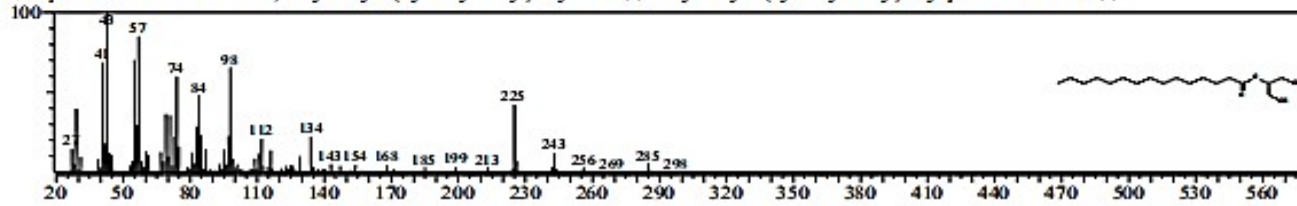

Fig. S5 Mass spectrum of the fragmentation products for the catalytic degradation of micronized HDPE in the presence of synthesized Zn-CP as catalyst.

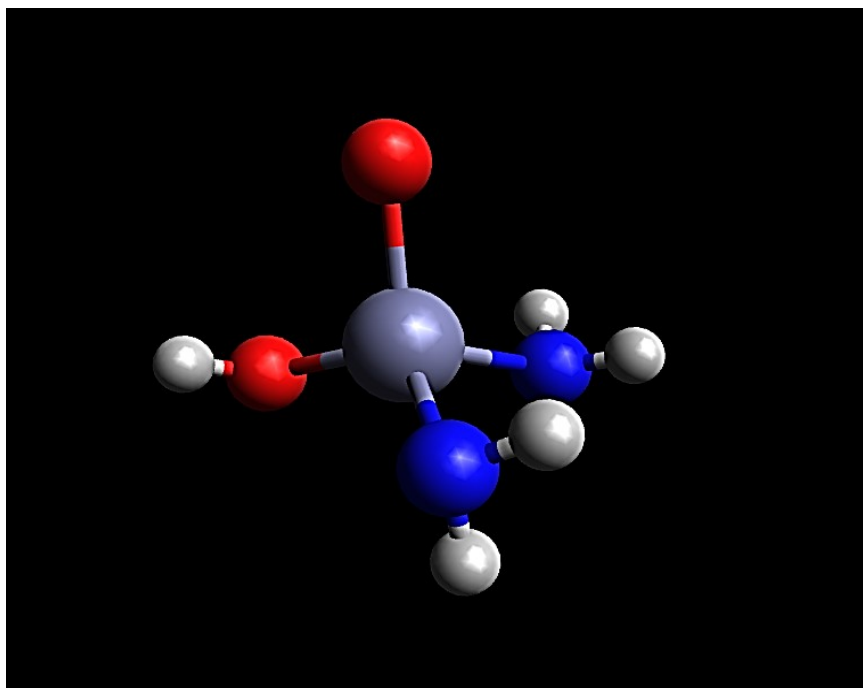

Fig. S6 Optimized structure of the Zn-CP active site

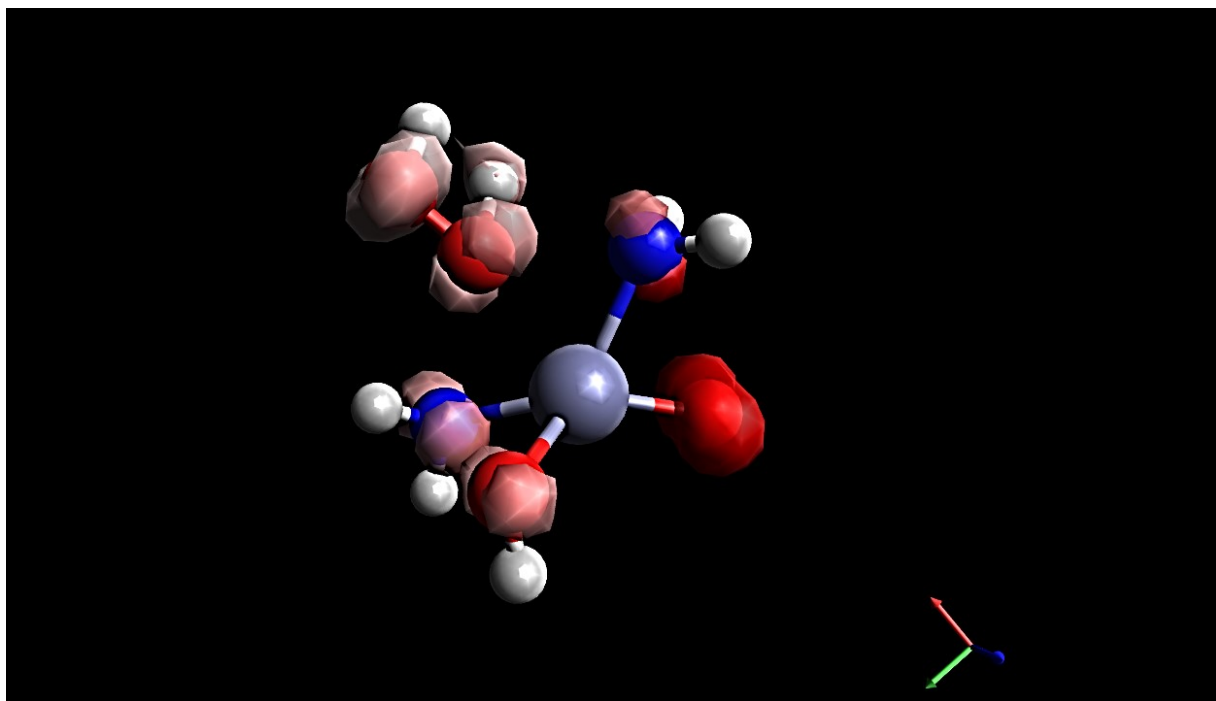

Fig. S7 the Zn-H<sub>2</sub>O<sub>2</sub> Complex

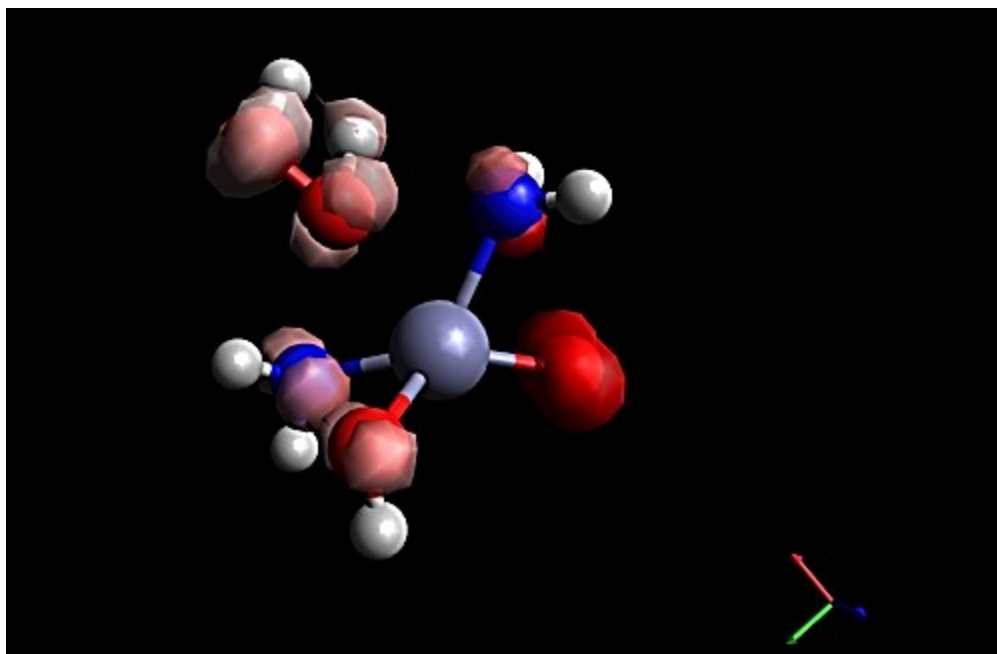

**Fig. S8** MESP (Molecular Electrostatic Potential) map for the Zn-CP
